# Supplementary material for: A non-canonical Δ9-desaturase synthesizing palmitoleic acid identified in the thraustochytrid Aurantiochytrium sp. T66
Source: PubMed Central journal article supplement (PMC8390409; doi:10.1007/s00253-021-11425-5), 2021-07-22
Supplement: 253_2021_11425_MOESM1_ESM.pdf [file 253_2021_11425_MOESM1_ESM.pdf]

## Supplementary Information

Applied Microbiology and Biotechnology

# **A non-canonical $\Delta 9$ -desaturase synthesizing palmitoleic acid identified in the thraustochytrid *Aurantiochytrium* sp. T66**

Authors

E-Ming Rau<sup>1</sup>, Inga Marie Aasen<sup>2</sup>, Helga Ertesvåg<sup>1\*</sup>

<sup>1</sup>Department of Biotechnology and Food Science, NTNU Norwegian University of Science and Technology, Trondheim, Norway

<sup>2</sup>Department of Biotechnology and Nanomedicine, SINTEF Industry, Trondheim, Norway

\* Correspondence to: [helga.ertesvag@ntnu.no](mailto:helga.ertesvag@ntnu.no)

**Supplemental Table S1** Strains used in this study

| Strain | Description                                                                                                   | Reference         |
|--------|---------------------------------------------------------------------------------------------------------------|-------------------|
| T66    | Wild-type <i>Aurantiochytrium</i> sp. T66                                                                     | ATCC <sup>®</sup> |
| SR21   | Wild-type <i>Aurantiochytrium limacinum</i> SR21                                                              | ATCC <sup>®</sup> |
| #26-1  | Transgenic strain derived from SR21 with <i>crtIBY</i> disrupted by <i>ble-2A-T66des9</i> expression cassette | this study        |
| #30-1  | Transgenic strain derived from SR21 with <i>crtIBY</i> disrupted by <i>ble</i> expression cassette            | this study        |

**Supplemental Table S2** Plasmids used in this study

| Plasmids    | Description                                                                                                                                         | Reference  |
|-------------|-----------------------------------------------------------------------------------------------------------------------------------------------------|------------|
| pUC19-18GZG | Amp <sup>R</sup> , <i>ble</i> flanked by SR21 endogenous GAPDH promoter and terminator                                                              | Addgene    |
| pEMR15      | Kan <sup>R</sup> , pCR <sup>TM</sup> Blunt II-TOPO <sup>®</sup> containing <i>ble</i> (rear part)-2A- <i>T66des9</i> -GAPDH terminator (front part) | This study |
| pEMR19      | Kan <sup>R</sup> , pCR <sup>TM</sup> Blunt II-TOPO <sup>®</sup> containing <i>crtIBY</i> homologous flanking sequence (upper)                       | This study |
| pEMR20      | Kan <sup>R</sup> , pCR <sup>TM</sup> Blunt II-TOPO <sup>®</sup> containing GAPDH promoter- <i>Ble</i> (front part)                                  | This study |
| pEMR21      | Kan <sup>R</sup> , pCR <sup>TM</sup> Blunt II-TOPO <sup>®</sup> containing GAPDH terminator (rear part)                                             | This study |
| pEMR22      | Kan <sup>R</sup> , pCR <sup>TM</sup> Blunt II-TOPO <sup>®</sup> containing <i>crtIBY</i> homologous flanking sequence (lower)                       | This study |
| pEMR23      | Amp <sup>R</sup> , containing GAPDH terminator (rear part)- <i>crtIBY</i> homologous flanking sequence (lower)                                      | This study |
| pEMR24      | Amp <sup>R</sup> , GAPDH promoter- <i>ble-2A-T66des9</i> -GAPDH terminator expression cassette flanked by <i>crtIBY</i> homologous sequences        | This study |
| pEMR26      | Amp <sup>R</sup> , GAPDH promoter- <i>ble</i> -GAPDH terminator expression cassette flanked by <i>crtIBY</i> homologous sequences                   | This study |

**Supplemental Table S3** Primers used in this study

| Primer short name | Primer                 | Sequence 5'→3'                                                                                 | Underlined region      |
|-------------------|------------------------|------------------------------------------------------------------------------------------------|------------------------|
| 1                 | KI2957-1-SmaI          | <u>CTCCCGGG</u> ACTTTCGTG                                                                      | <i>XmaI/SmaI</i>       |
| 2                 | KI2957-2-2a            | <u>GTCTCCTGCTTGCTTGAGCAGAGAGAAGTTCGTG</u><br><u>GCTCCGGATCCGTCCTGCTCCTCGGC</u>                 | partial 2A<br>sequence |
| 3                 | KI2957-3-2a            | <u>GCCACGAACTTCTCTCTGCTCAAGCAAGCAGGAG</u><br><u>ACGTGGAAGAAAACCCCGGTCCTTGCAAGGTGG</u><br>AGCCC | partial 2A<br>sequence |
| 4                 | KI2957-4               | TACATGTCGACTCTAGAGGATCCCCTTAGAGCGT<br>CTTGGCCTTG                                               |                        |
| 5                 | KI2957-5               | GGGGATCCTCTAGAGTCGAC                                                                           |                        |
| 6                 | KI2957-6               | CAGAAATA <u>CTAGT</u> TTTGTGAATGAAAAGAGATG<br>ATAAAAG                                          | <i>SpeI</i>            |
| 7                 | GAPDHpro_SbfI-F        | AT <u>ACCTGCAGGG</u> GAGACGAGCATATGACTACTG                                                     | <i>SbfI</i>            |
| 8                 | Ble_inside_SmaI-R      | ACGAAGT <u>CCCGGG</u> GAGAAC                                                                   | <i>XmaI/SmaI</i>       |
| 9                 | GAPDHter_inside-SpeI-F | CATTCACAAA <u>ACTAGT</u> ATTTCTGCATTAGAAATC                                                    | <i>SpeI</i>            |
| 10                | GAPDHter-NotI-R        | ATAG <u>CGGCCG</u> CAGCGGATAACAATTTACACAG<br>G                                                 | <i>NotI</i>            |
| 11                | SR21 CrtUF             | <u>GGTACCTGGATGCCTGAGGTCTTC</u>                                                                | <i>KpnI</i>            |
| 12                | SR21 CrtUR             | GGGCCCATTAAT <u>CCTGCAGGGA</u> ATACATGGCTGC<br>GCTAC                                           | <i>SbfI</i>            |
| 13                | SR21 CrtD-NotI-F       | ATAG <u>CGGCCG</u> CCGCTCGCTTTCTTGATACTG                                                       | <i>NotI</i>            |
| 14                | SR21 CrtDR             | ATTGTCACAGGGCGAACG                                                                             |                        |
| 15                | 21crt-midR             | CGGCCGTGTTTCATATAAGAG                                                                          |                        |
| 16                | 21CrtUFcheck           | TGGCAGAGCTCATCAGTTTG                                                                           |                        |
|                   | zeo sjekk-f            | AGTTGACCAGTGCCGTTCC                                                                            |                        |
|                   | zeoRT-r                | CGAAGTCGTCCTCCACGAAG                                                                           |                        |
|                   | SR21tubF2              | TGTTGAGAACGCTGATGAGG                                                                           |                        |
|                   | SR21tubR2              | CGAGCTTACGGAGGTCAGAG                                                                           |                        |
|                   | 2957RT-f               | GTCAACGCCTACCTCATTGGG                                                                          |                        |
|                   | 2957RT-r               | CTTGGAGAAGAGGTGGTGCG                                                                           |                        |

**Supplemental Table S4** T66Des9 homologs that showed the highest degree of identity with proteins encoded by different genera or thraustochytrids species using BLAST in the non-redundant protein sequences database at Genbank

| Accession      | Description                                                    | Species                                   | Query Cover | E value   | Per. Ident |
|----------------|----------------------------------------------------------------|-------------------------------------------|-------------|-----------|------------|
| AOG21009.1     | delta12 desaturase                                             | <i>Thraustochytrium</i> sp. ATCC 26185    | 100%        | 0         | 100.00%    |
| GBG24140.1     | Delta12-fatty-acid desaturase                                  | <i>Hondaia fermentalgiana</i>             | 100%        | 0         | 80.65%     |
| BAM37464.1     | delta12-fatty acid desaturase (TauΔ12des)                      | <i>Thraustochytrium aureum</i>            | 99%         | 1.00E-124 | 44.12%     |
| AAO23564.1     | delta 12 fatty acid desaturase (PpDes12)                       | <i>Phaeodactylum tricorutum</i>           | 97%         | 8.00E-119 | 44.34%     |
| BAO27791.1     | delta12 desaturase-b                                           | <i>Fistulifera solaris</i>                | 90%         | 1.00E-110 | 44.19%     |
| OEU07512.1     | delta 12 fatty acid desaturase                                 | <i>Fragilariopsis cylindrus</i> CCMP1102  | 91%         | 2.00E-109 | 44.25%     |
| XP_002292071.1 | predicted protein                                              | <i>Thalassiosira pseudonana</i> CCMP1335  | 91%         | 3.00E-106 | 41.67%     |
| VEU44279.1     | unnamed protein product                                        | <i>Pseudo-nitzschia multistriata</i>      | 90%         | 2.00E-103 | 42.57%     |
| CEM11741.1     | unnamed protein product                                        | <i>Vitrella brassicaformis</i> CCMP3155   | 88%         | 1.00E-101 | 43.32%     |
| XP_009035621.1 | hypothetical protein AURANDRAFT_24467                          | <i>Aureococcus anophagefferens</i>        | 87%         | 2.00E-100 | 42.01%     |
| MBC8351339.1   | fatty acid desaturase                                          | <i>Planctomycetes bacterium</i>           | 86%         | 7.00E-93  | 42.12%     |
| KAA8495721.1   | Omega-6 fatty acid desaturase, endoplasmic reticulum isozyme 2 | <i>Porphyridium purpureum</i>             | 96%         | 8.00E-93  | 38.69%     |
| NLA37757.1     | fatty acid desaturase                                          | <i>Actinobacteria bacterium</i>           | 85%         | 7.00E-87  | 41.32%     |
| XP_002507091.1 | fatty acid desaturase                                          | <i>Micromonas commoda</i>                 | 94%         | 6.00E-85  | 38.06%     |
| CEO99628.1     | hypothetical protein PBRA_007361                               | <i>Plasmodiophora brassicae</i>           | 90%         | 7.00E-84  | 37.99%     |
| XP_001454547.1 | hypothetical protein                                           | <i>Paramecium tetraurelia</i> strain d4-2 | 85%         | 2.00E-83  | 39.28%     |
| NLD75814.1     | fatty acid desaturase                                          | <i>Acidimicrobiales bacterium</i>         | 92%         | 2.00E-82  | 39.19%     |
| HBU37186.1     | TPA: fatty acid desaturase                                     | <i>Planctomycetaceae bacterium</i>        | 91%         | 8.00E-82  | 37.98%     |
| KAF4668261.1   | linoleoyl-CoA desaturase activity                              | <i>Perkinsus chesapeaki</i>               | 87%         | 2.00E-81  | 38.92%     |
| XP_003075374.1 | Fatty acid desaturase, type 1                                  | <i>Ostreococcus tauri</i>                 | 86%         | 1.00E-80  | 38.21%     |
| RHZ75025.1     | hypothetical protein Glove_218g3                               | <i>Diversispora epigaea</i>               | 95%         | 6.00E-80  | 34.91%     |

|                    |                                                                                 |                                            |     |          |        |
|--------------------|---------------------------------------------------------------------------------|--------------------------------------------|-----|----------|--------|
| QDZ17765.1         | delta(12)-fatty-acid desaturase                                                 | <i>Chloropicon primus</i>                  | 84% | 2.00E-78 | 38.72% |
| ABQ01458.1         | oleate 12-hydroxylase                                                           | <i>Physaria lindheimeri</i>                | 84% | 2.00E-78 | 38.14% |
| XP_01886021<br>2.1 | delta(12)-fatty-acid desaturase FAD2-<br>like                                   | English walnut                             | 93% | 3.00E-78 | 38.78% |
| XP_00402505<br>0.1 | hypothetical protein IMG5_193510                                                | <i>Ichthyophthirius multifiliis</i>        | 91% | 6.00E-78 | 37.28% |
| KRX08182.1         | hypothetical protein PPERSA_12337                                               | <i>Pseudocohnilembus persalinus</i>        | 88% | 7.00E-78 | 36.19% |
| GHP07573.1         | linoleoyl-CoA desaturase                                                        | <i>Pycnococcus provasolii</i>              | 84% | 9.00E-78 | 40.77% |
| XP_02264045<br>9.1 | omega-6 fatty acid desaturase,<br>endoplasmic reticulum isozyme 2<br>isoform X2 | mung bean                                  | 91% | 2.00E-77 | 39.16% |
| KAF8643095.<br>1   | hypothetical protein HU200_066967                                               | <i>Digitaria exilis</i>                    | 95% | 2.00E-77 | 38.00% |
| KAB8088627.<br>1   | hypothetical protein EE612_013286                                               | rice                                       | 89% | 3.00E-77 | 38.96% |
| XP_01722051<br>8.1 | PREDICTED: delta(12)-fatty-acid<br>desaturase FAD2-like                         | <i>Daucus carota</i> subsp. <i>sativus</i> | 90% | 4.00E-77 | 37.86% |

---

**Supplemental Table S5** List of thraustochytrid species encoding proteins closely related to T66Des9 by using BLAST in the databases<sup>a</sup> at Genbank

| Species                                      | nr <sup>b</sup> |              | wgs <sup>c</sup> |              |
|----------------------------------------------|-----------------|--------------|------------------|--------------|
|                                              | Accession       | Identity (%) | Accession        | Identity (%) |
| <i>Aurantiochytrium</i> sp. KH105            |                 |              | BGKB01000047.1   | 87           |
| <i>Aurantiochytrium</i> sp. KH105            |                 |              | BGKB01000033.1   | 80           |
| <i>Hondaia fermentalgiana</i> strain FCC1311 | GBG24140.1      | 80.65        | NPFB01000004.1   | 81           |
| <i>Schizochytrium</i> sp. CCTCC M209059      |                 |              | JTFK01001013.1   | 86           |
| <i>Thraustochytrium aureum</i> ATCC 34304    | BAM37464.1      | 44.12        | BLSG01000191.1   | 43           |
| <i>Thraustochytrium</i> sp. ATCC 26185       | AOG21009.1      | 100          |                  |              |

<sup>a</sup>No relevant results were obtained from the sequenced *heterokonts* available at JGI database. <sup>b</sup>The non-redundant protein sequences database at Genbank. <sup>c</sup>The *Labyrinthulomycetes* part of the whole genome shotgun database at Genbank

**Supplemental Table S6** Fatty acid compositions of *A. limacinum* SR21 strains: all analyzed timepoints <sup>a</sup>

| Strain       | g/l <sup>b</sup> |           |           |           |           |           |           |           |           |           |
|--------------|------------------|-----------|-----------|-----------|-----------|-----------|-----------|-----------|-----------|-----------|
|              | WT               |           |           | 30-1      |           |           | 26-1      |           |           |           |
|              | Hr<br>FA         | 16.5      | 36        | 60        | 16.5      | 36        | 60        | 16.5      | 36        | 60        |
| C14:0        |                  | 0.11±0.01 | 0.28±0.01 | 0.34±0.01 | 0.11±0.01 | 0.31±0.01 | 0.36±0.01 | 0.13±0.01 | 0.34±0.03 | 0.38±0.04 |
| C15:0        |                  | 0         | 0         | 0         | 0         | 0         | 0         | 0         | 0         | 0         |
| C16:0        |                  | 1.53±0.06 | 3.46±0.1  | 4.71±0.3  | 1.36±0.12 | 3.36±0.21 | 4.35±0.3  | 1.37±0.23 | 3.32±0.07 | 3.99±0.19 |
| C16:1        |                  | 0         | 0         | 0         | 0         | 0         | 0         | 0.06±0    | 0.15±0.01 | 0.2±0.01  |
| C17:0        |                  | 0         | 0         | 0         | 0         | 0         | 0         | 0         | 0         | 0         |
| C18:0        |                  | 0.02±0.03 | 0.05±0.07 | 0.12±0    | 0.04±0    | 0.06±0.03 | 0.09±0.04 | 0.04±0    | 0.09±0    | 0.1±0     |
| C18:1        |                  | 0         | 0         | 0         | 0         | 0         | 0         | 0.05±0    | 0.12±0    | 0.18±0    |
| C20:5        |                  | 0.02±0    | 0.02±0    | 0         | 0.01±0    | 0.02±0    | 0.02±0    | 0.01±0    | 0.02±0    | 0.02±0    |
| C22:5        |                  | 0.24±0.04 | 0.58±0.06 | 0.79±0.08 | 0.21±0    | 0.6±0.02  | 0.77±0.04 | 0.21±0.01 | 0.58±0.05 | 0.71±0.03 |
| C22:6        |                  | 0.74±0.11 | 1.8±0.12  | 2.63±0.48 | 0.64±0.02 | 1.78±0.01 | 2.31±0.18 | 0.66±0.08 | 1.66±0.02 | 2.05±0.14 |
| <b>Total</b> |                  | 2.64±0.2  | 6.18±0.22 | 8.61±0.72 | 2.37±0.15 | 5.32±1.28 | 6.87±1.85 | 2.51±0.34 | 6.21±0.05 | 7.54±0.35 |

| Strain | % <sup>c</sup> |                |                |                |                |                |                |                |                |                |
|--------|----------------|----------------|----------------|----------------|----------------|----------------|----------------|----------------|----------------|----------------|
|        | WT             |                |                | 30-1           |                |                | 26-1           |                |                |                |
|        | Hr<br>FA       | 16.5           | 36             | 60             | 16.5           | 36             | 60             | 16.5           | 36             | 60             |
| C14:0  |                | 4.18±0.17      | 4.48±0.26      | 3.93±0.23      | 4.51±0.02      | 5.11±0.22      | 4.62±0.44      | 5.01±0.15      | 5.47±0.45      | 5.07±0.36      |
| C15:0  |                | 0              | 0              | 0              | 0              | 0              | 0              | 0              | 0              | 0              |
| C16:0  |                | 58.04±2.2<br>7 | 55.98±0.3<br>2 | 54.72±1.0<br>2 | 57.43±1.4<br>7 | 54.81±2.1<br>3 | 55.18±0.9<br>2 | 54.69±1.6<br>3 | 53.51±0.6<br>6 | 52.94±0.0<br>2 |
| C16:1  |                | 0              | 0              | 0              | 0              | 0              | 0              | 2.36±0.14      | 2.42±0.13      | 2.66±0.07      |
| C17:0  |                | 0              | 0              | 0              | 0              | 0              | 0              | 0              | 0              | 0              |
| C18:0  |                | 0.78±1.1       | 0.74±1.04      | 1.36±0.06      | 1.78±0.1       | 1.03±0.51      | 1.1±0.54       | 1.71±0.14      | 1.44±0.02      | 1.4±0.09       |
| C18:1  |                | 0              | 0              | 0              | 0              | 0              | 0              | 2.08±0.21      | 1.89±0.07      | 2.37±0.14      |
| C20:5  |                | 0.29±0.01      | 0.26±0.01      | 0              | 0.3±0.01       | 0.27±0.02      | 0.3±0.01       | 0.28±0.01      | 0.26±0.01      | 0.29±0.02      |
| C22:5  |                | 8.89±0.99      | 9.37±1.38      | 9.19±1.65      | 8.69±0.58      | 9.75±0.61      | 9.66±0.74      | 8.52±0.61      | 9.31±0.82      | 9.42±0.86      |
| C22:6  |                | 27.82±2.2      | 29.18±0.9<br>3 | 30.47±3.0<br>7 | 27.26±0.7<br>9 | 29±0.75        | 29.11±0.8<br>2 | 26.57±0.5      | 26.73±0.4<br>5 | 27.13±0.5<br>7 |

<sup>a</sup>Data are expressed as the mean ±variation of two replicates originated from two independent cultures. The data of each replicate of strain 30-1 and 26-1 are the mean of two separate runs of FA analysis. <sup>b</sup>Grams per liter of the culture. <sup>c</sup>Percentage of total fatty acids. The FAs less than 0.01 g/l were considered as background signals and were not shown

**Supplemental Table S7** Fatty acid compositions of *A. limacinum* SR21 strain 26-1 and *Aurantiochytrium* sp. T66 WT with the isomers distinguished

| <b>Fatty acid</b>        | <b>Peak Area % of identified FAMES</b> |            |
|--------------------------|----------------------------------------|------------|
|                          | <b>26-1</b>                            | <b>T66</b> |
| C14:0                    | 3.76                                   | 13.75      |
| C14:1 n-5                | < 0.1                                  | < 0.1      |
| C16:0                    | 55.67                                  | 32.82      |
| C16:1 n-7                | 2.64                                   | 13.62      |
| C18:0                    | 1.57                                   | 1.23       |
| C18:1 n-9                | < 0.1                                  | < 0.1      |
| C18:1 n-7                | 2.45                                   | 8.17       |
| C18:3 n-3                | < 0.1                                  | < 0.1      |
| C20:0                    | 0.20                                   | < 0.1      |
| C20:4 n-6                | 0.23                                   | 0.15       |
| C20:5 n-3 (EPA)          | 0.26                                   | 0.48       |
| C22:0                    | 0.11                                   | < 0.1      |
| C22:5 n-3 (DPA)          | 5.99                                   | 7.97       |
| C24:0                    | < 0.1                                  | 0.17       |
| C22:6 n-3 (DHA)          | 26.99                                  | 21.42      |
| Sum identified FAMES (%) | 99.40                                  | 98.19      |
| Sum unknown peaks (%)    | 0.60                                   | 1.65       |
| LOQ 0.1%                 |                                        |            |



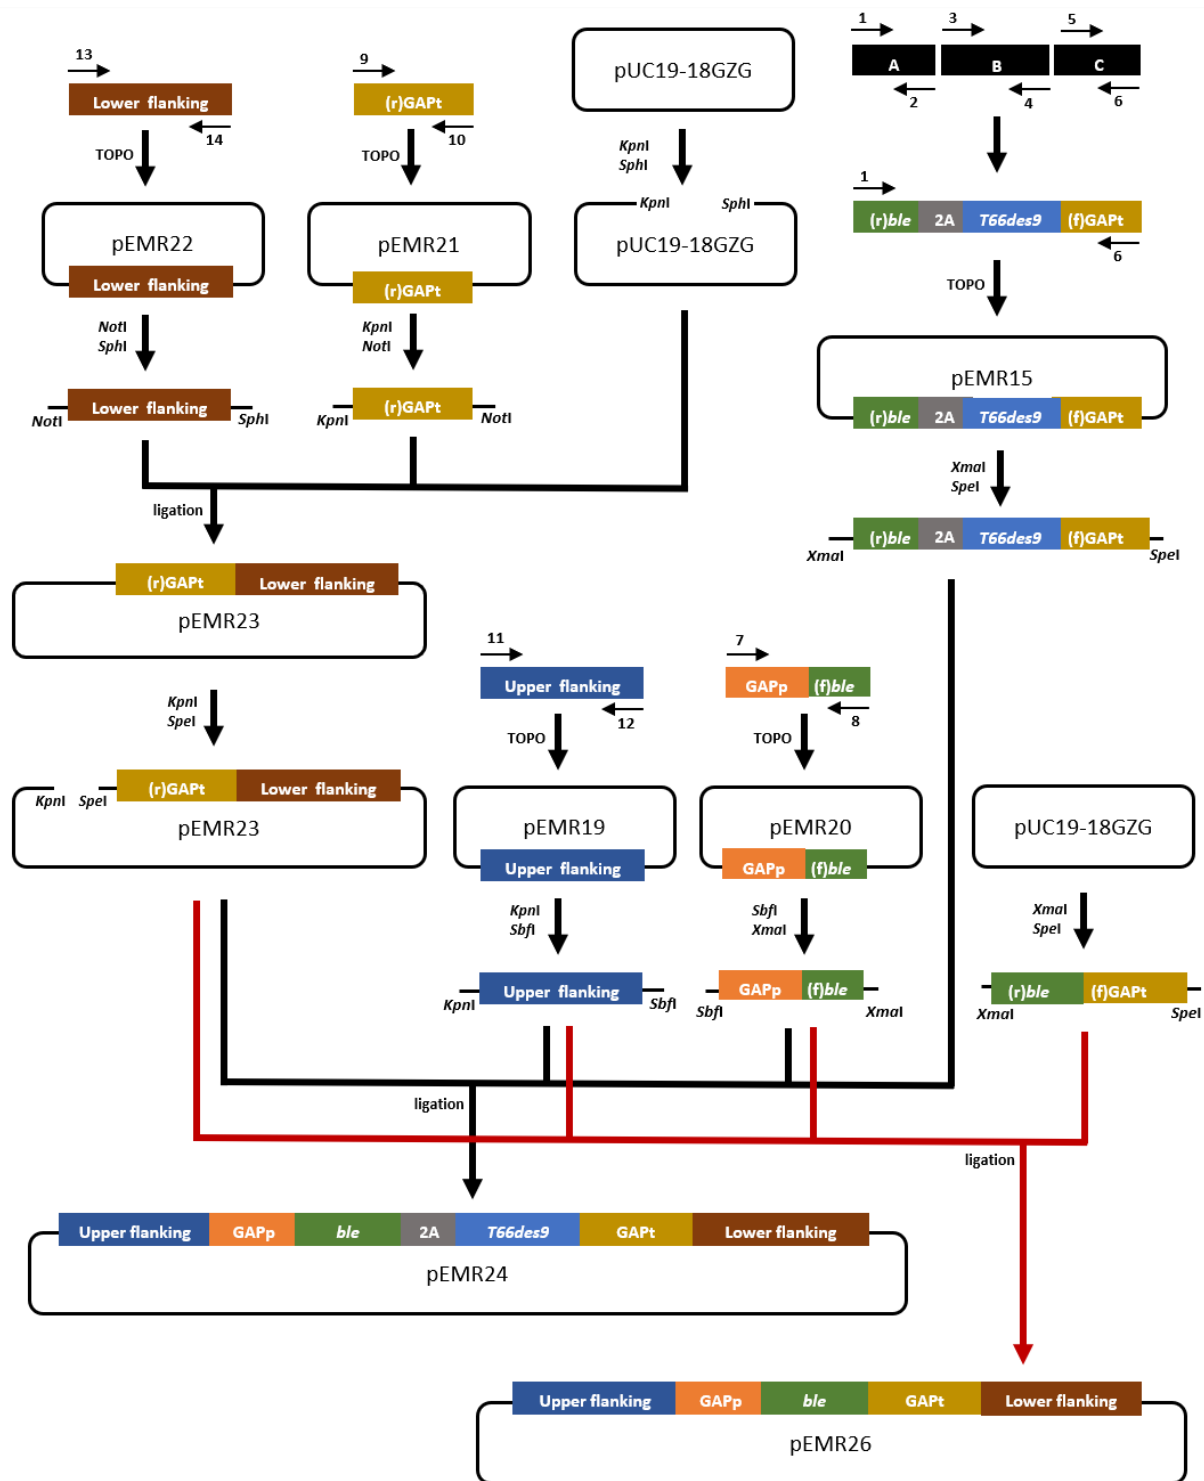

**Supplemental Fig. S1** Scheme of constructing pEMR24 and pEMR26. Upper/Lower flanking: *critBY* homologous regions; GAPp: GAPDH promoter; GAPt: GAPDH terminator; (f)/(r)GAPt: the front/rear of GAPt; *ble*: Zeocin resistance gene; (f)/(r)*ble*: the front/rear of *ble*; 2A: peptide self-cleavage sequence; 1~12: PCR primers

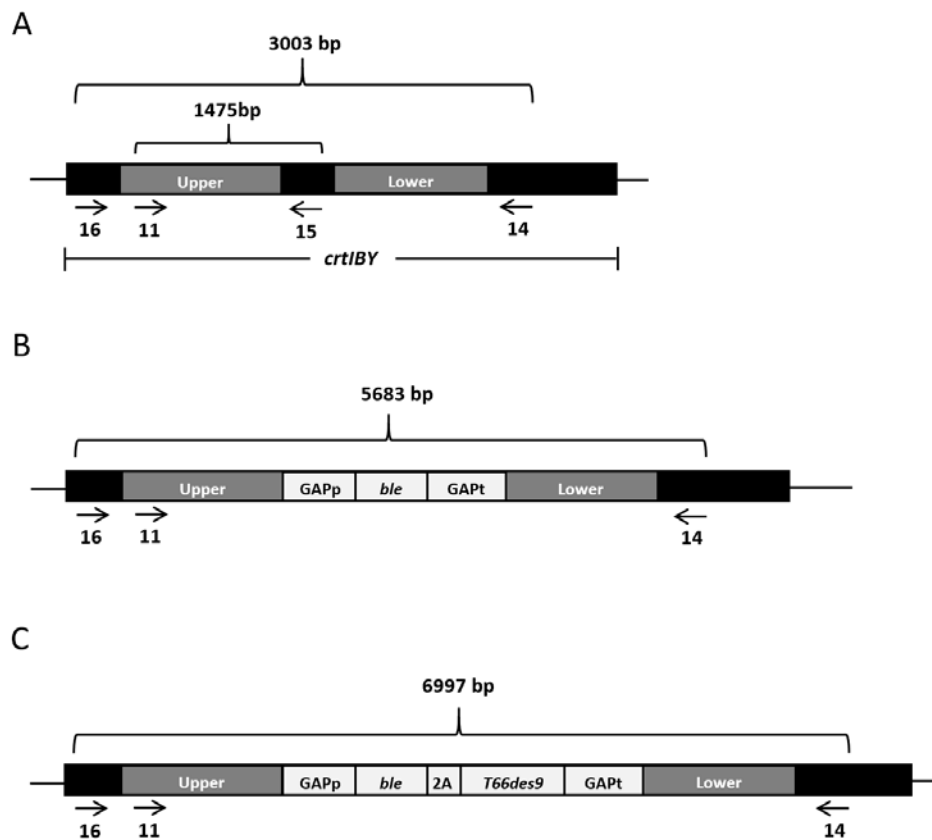

**Supplemental Fig. S2** Illustration of the sizes of PCR products amplified from the genomic DNA of (A) WT and non-transformants (30-18 and 30-22), (B) strain 30-1, 30-21 and 30-23, (C) strain 26-1. Primer pair 11+15 amplified fragments of 1475bp only from WT, 30-18 and 30-22. Primer pair 16 + 14 amplified larger PCR fragments of 6997bp and 5683bp from 26-1, and the three strains (30-1, 30-21 and 30-23), respectively. Primer pair 16 and 14 amplified a shorter fragment of 3003bp from WT, 30-18 and 30-22. Upper/Lower: *crtIBY* homologous regions; GAPp/t: GAPDH promoter/terminator; *ble*: Zeocin resistance gene; 2A: peptide self-cleavage sequence; Arrows: primer annealing sites
